# Supplementary material
Source: publisher site journal article supplement (https://www.dovepress.com/article/547335)
Supplement: Supplementary file 1 [file 547335%20Revised%20Supplementary%20Material.docx]

**Supplementary Table S1.** Distribution of chronic disease types and specific diagnoses among study participants (N = 1,222).

| **Types of chronic diseases** | **Specific chronic diseases** | **Frequency, n (%)** | **Total frequency per type, n (%)** |
| --- | --- | --- | --- |
| Respiratory disorders | Bronchial asthma | 77 (57.9%) | 133 (10.9%) |
| Sinusitis | 7 (5.3%) |
| Bronchitis | 32 (24.1%) |
| Chronic obstructive pulmonary disease and rhinitis | 17 (12.8%) |
| Gastrointestinal disorders | Gastroesophageal Reflux Disease | 61 (21.0%) | 291 (23.8%) |
| Piles | 47 (16.2%) |
| Constipation | 93 (32.0%) |
| Gastric ulcer | 42 (14.4%) |
| Others | 48 (16.5%) |
| Urinary disorders | Urinary tract infection | 44 (78.6%) | 56 (4.6%) |
| Renal failure | 6 (10.7%) |
| Others | 6 (10.7%) |
| Dermatological disorders | Eczema | 24 (10.3%) | 233 (19.1%) |
| Ringworm infestation | 49 (21.0%) |
| Psoriasis | 48 (20.6%) |
| Scabies | 64 (27.5%) |
| Allergic dermatitis | 36 (15.5%) |
| Others | 12 (5.2%) |
| Reproductive disorders | Polycystic ovary syndrome | 13 (9.8%) | 132 (10.8%) |
| Menstrual disorder | 47 (35.6%) |
| Erectile disfunction | 34 (25.8%) |
| Others | 38 (28.8%) |
| Musculoskeletal disorders | Osteoarthritis | 33 (29.5%) | 112 (9.2%) |
| Rheumatoid arthritis | 13 (11.6%) |
| Osteoporosis | 22 (19.6%) |
| Gout | 28 (25.0%) |
| Others | 16 (14.3%) |
| Endocrine disorders | Diabetes | 45 (69.2%) | 65 (5.3%) |
| Others | 20 (30.8%) |
| Cardiovascular and hematological disorders | Hypertension | 65 (64.3%) | 101 (8.3%) |
| Anemia | 33 (32.7%) |
| Varicose vein | 2 (2.0%) |
| Rheumatic fever | 1 (1.0%) |
| Neurological disorders | Headache | 21 (55.3%) | 38 (3.1%) |
| Others | 17 (44.7%) |
| Other disorders | Chronic insomnia | 54 (88.5%) | 61 (5.0%) |
| Depression | 1 (1.6%) |
| Malnutrition | 4 (6.6%) |
| Dental disorder | 1 (1.6%) |
| Myopia | 1 (1.6%) |

*Legend:* Frequencies are presented as n (%). The table provides a breakdown of individual chronic diseases within each category, as well as the total frequency per chronic disease type.
